# Supplementary material for: Evaluation of Antibody Kinetics Following COVID-19 Vaccination in Greek SARS-CoV-2 Infected and Naïve Healthcare Workers
Source: MDPI journal article supplement (doi:10.3390/jpm13060910), 2023-05-29
Supplement: s1 [file s1]

**Table S2.** Univariate and multivariate logistic regression analysis demonstrating the associations between SARS-CoV-2 reinfection and co-morbidities.

|                   | SARS-CoV-2 reinfection |              |                       |              |
|-------------------|------------------------|--------------|-----------------------|--------------|
|                   | Univariate analysis    |              | Multivariate analysis |              |
|                   | Odds ratio (95% CI)    | p-value      | Odds ratio (95% CI)   | p-value      |
| Age               | 0.975 (0.951 – 0.997)  | <b>0.046</b> | 0.956 (0.927 – 0.986) | <b>0.004</b> |
| Sex (male)        | 1.158 (0.592 – 2.267)  | 0.668        | 0.991 (0.483 – 2.037) | 0.981        |
| Obesity           | 0.508 (0.234 – 1.101)  | 0.086        | 0.434 (0.179 – 1.050) | 0.064        |
| Hypertension      | 0.728 (0.313 – 1.693)  | 0.461        | 0.871 (0.260 – 2.915) | 0.823        |
| Dyslipidemia      | 0.606 (0.288 – 1.273)  | 0.186        | 0.575 (0.202 – 1.631) | 0.298        |
| Diabetes mellitus | 0.995 (0.231 – 4.280)  | 0.995        | 1.608 (0.312 – 8.277) | 0.570        |
| CAD               | 0.342 (0.039 – 2.472)  | 0.232        | 0.183 (0.024 – 1.637) | 0.126        |

CI, confidence interval; CAD, coronary artery disease. Bold values indicate statistically significant values ( $P < 0.05$ ).
