# Supplementary material for: Evaluation of Antibody Kinetics Following COVID-19 Vaccination in Greek SARS-CoV-2 Infected and Naïve Healthcare Workers
Source: MDPI journal article supplement (doi:10.3390/jpm13060910), 2023-05-29
Supplement: s1 [file s1]

**Table S1.** Association of the time from the second vaccine dose to first SARS-CoV-2 infection and of the time from the second vaccine dose to SARS-CoV-2 reinfection with co-morbidities.

|                   | Time from the second vaccine dose to first SARS-CoV-2 infection |              |                           |              |
|-------------------|-----------------------------------------------------------------|--------------|---------------------------|--------------|
|                   | Univariate analysis                                             |              | Multivariate analysis     |              |
|                   | Unstandardized b (95% CI)                                       | P-value      | Unstandardized b (95% CI) | P-value      |
| Age               | 0.033 (-0.005 – 0.070)                                          | 0.088        | 0.035 (-0.007 – 0.078)    | 0.105        |
| Sex               | -0.167 (-1.150 – 0.815)                                         | 0.737        | -0.019 (-1.020 – 0.982)   | 0.971        |
| Obesity           | -0.717 (-1.962 – 0.528)                                         | 0.258        | -1.075 (-2.372 – 0.222)   | 0.104        |
| Hypertension      | 0.634 (-0.563 – 1.831)                                          | 0.298        | 0.008 (-1.513 – 1.530)    | 0.991        |
| Dyslipidemia      | 0.732 (-0.439 – 1.903)                                          | 0.220        | 0.290 (-1.180 – 1.760)    | 0.698        |
| Diabetes mellitus | 0.436 (-1.419 – 2.292)                                          | 0.644        | -0.047 (-2.103 – 2.008)   | 0.964        |
| CAD               | 2.904 (-0.705 – 6.513)                                          | 0.114        | 2.451 (-1.337 – 6.238)    | 0.204        |
|                   | Time from the second vaccine dose to SARS-CoV-2 reinfection     |              |                           |              |
|                   | Univariate analysis                                             |              | Multivariate analysis     |              |
|                   | Unstandardized b (95% CI)                                       | P-value      | Unstandardized b (95% CI) | P-value      |
| Age               | 0.128 (0.005 – 0.250)                                           | <b>0.041</b> | 0.192 (0.044 – 0.341)     | <b>0.013</b> |
| Sex               | 2.245 (-0.891 – 5.381)                                          | 0.154        | 1.985 (-1.342 – 5.313)    | 0.230        |
| Obesity           | -0.634 (-4.122 – 2.853)                                         | 0.713        | -3.975 (-8.362 – 0.413)   | 0.074        |
| Hypertension      | 0.713 (-3.607 – 5.034)                                          | 0.738        | 3.474 (-6.868 – 13.816)   | 0.495        |
| Dyslipidemia      | 0.906 (-2.881 – 4.692)                                          | 0.629        | -0.982 (-9.337 – 7.373)   | 0.810        |
| Diabetes mellitus | 1.984 (-7.018 – 10.986)                                         | 0.656        | 5.936 (-6.556 – 18.429)   | 0.336        |
| CAD               | -2.110 (-8.555 – 4.335)                                         | 0.509        | -4.675 (-12.788 – 3.438)  | 0.246        |

CI, confidence interval; CAD, coronary artery disease. Bold values indicate statistically significant values (P < 0.05).
